# Supplementary material for: Non-Pharmacological Preventive Measures Had an Impact on COVID-19 in Healthcare Workers before the Vaccination Effect: A Cohort Study
Source: MDPI journal article supplement (doi:10.3390/ijerph19063628), 2022-03-18
Supplement: s1 [file s1]

## Supplementary Table

Table S1. Main sociodemographic and occupational characteristics. PSMar healthcare workers, 2020 ( $n = 5543$ ).

|                         |                                     | <i>n</i> | %    |
|-------------------------|-------------------------------------|----------|------|
| Sex                     | Women                               | 4,066    | 73.4 |
|                         | Men                                 | 1,477    | 26.6 |
| Age                     | 18-29 years                         | 1,701    | 30.7 |
|                         | 30-49 years                         | 2,401    | 43.3 |
|                         | 50-70 years                         | 1,439    | 26.0 |
| Health building centres | Hospital Mar                        | 3,641    | 65.7 |
|                         | Hospital Esperança                  | 541      | 9.8  |
|                         | Fòrum centre                        | 450      | 8.1  |
|                         | Dr. Emili Mira Centre               | 586      | 10.6 |
|                         | Others                              | 321      | 5.8  |
| Contract arrangement    | Permanent                           | 3,358    | 61.7 |
|                         | Temporary                           | 1,106    | 20.0 |
|                         | Replacement                         | 1,017    | 18.3 |
| Occupational category   | Physicians                          | 838      | 15.1 |
|                         | Nurses and aides                    | 2,832    | 51.1 |
|                         | Other healthcare workers            | 1,005    | 18.1 |
|                         | Administration and management staff | 868      | 15.7 |
